# Supplementary material
Source: PubMed Central journal article supplement (PMC7165047)
Supplement: NIHMS1562305-supplement-1.pdf [file NIHMS1562305-supplement-1.pdf]

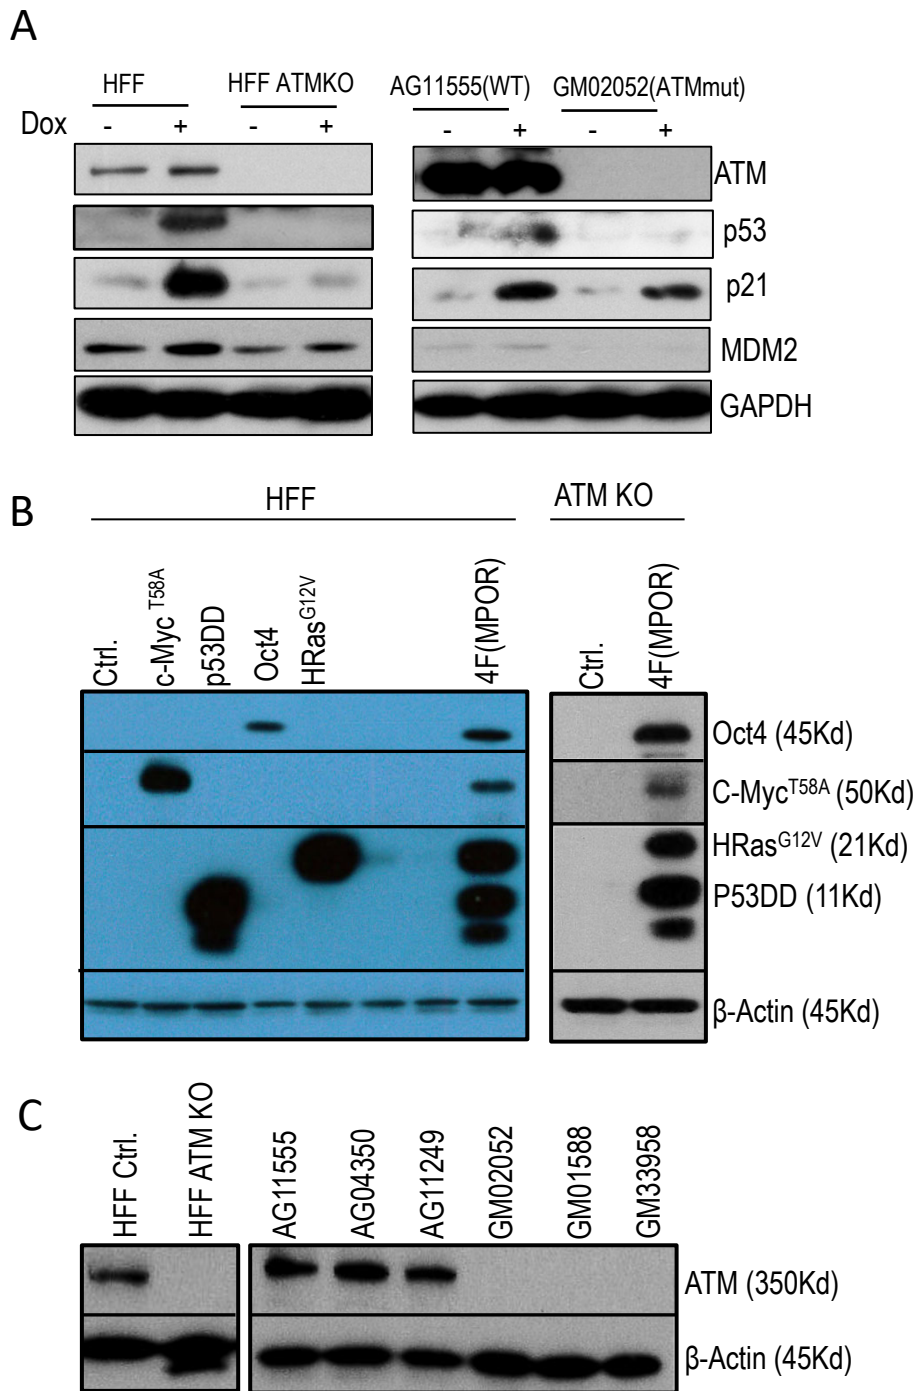

**Fig. S1. Western blot analysis of exogenous and endogenous expression.**

**A).** Western blot shows ATM, p53, p21 and MDM2 expression in doxorubicin-(Dox, 1 $\mu$ M, 24 hrs) treated control and putative ATM knockout HFF cells (left panel), and primary fibroblasts derived from normal (AG11555, WT) and A-T patients (GM02052, ATMmut) cells. GAPDH as loading control.

**B).** Efficient expression of exogenous oncogenic factors in parental and ATM-deficient HFF cells .

**C).** ATM status in control and putative ATM knockout HFF cells (left panel), and primary fibroblasts derived from normal (AG11555, AG04350, AG11249) and A-T patients (GM02052, GM01588, GM33958).
