# Supplementary material
Source: PubMed Central journal article supplement (PMC7165047)
Supplement: NIHMS1562305-supplement-2.pdf [file NIHMS1562305-supplement-2.pdf]

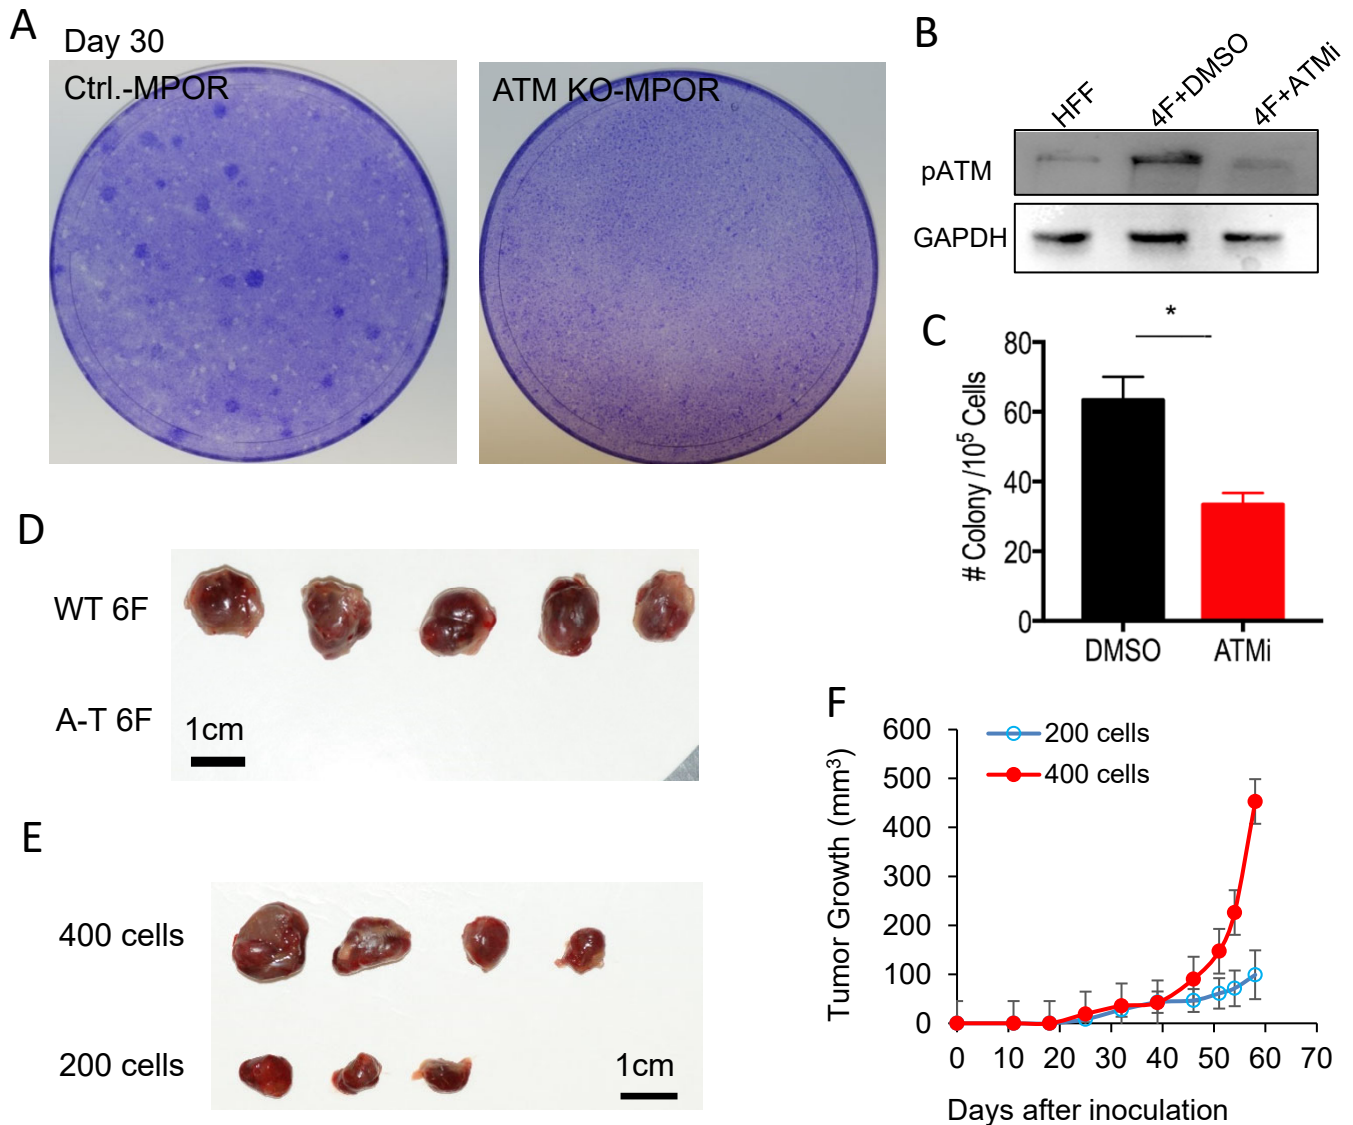

**Fig. S2. Additional data on oncogene-induced transformation of HFF cells.**

**A).** Representative crystal violet stained Petri dish with MPOR-transduced HFF and HFF-ATMKO cells at day 30 post gene transduction.

**B).** Western blot shows phosphorylated ATM (pATM) expression in MPOR (4F) transduced HFF cells treated with DMSO (4F+DMSO) or 2  $\mu$ M ATM inhibitor (ATMi: KU55933). GAPDH as loading control.

**C).** Morphologically transformed colony outgrowth in MPOR-transduced HFF cells treated with 2  $\mu$ M ATM inhibitor (KU55933) for 16 days.  $n=3$ , error bars represent SEM. \*  $p<0.05$ , unpaired t test.

**D).** Tumors grown from MPORCC transduced primary fibroblast cells from normal adults and A-T patients in nude mice. About  $1 \times 10^6$  cells were injected into each mice.

**E).** Tumors grown from small numbers (400 and 200 cells) of MPORCC transduced primary fibroblast cells from normal adults in nude mice.

**F).** Kinetics of tumor growth from small numbers (400 and 200 cells) of MPORCC transduced primary fibroblast cells from normal adults in nude mice.  $n=6$ , error bars represent SEM.
