# Supplementary material
Source: PubMed Central journal article supplement (PMC7165047)
Supplement: NIHMS1562305-supplement-3.pdf [file NIHMS1562305-supplement-3.pdf]

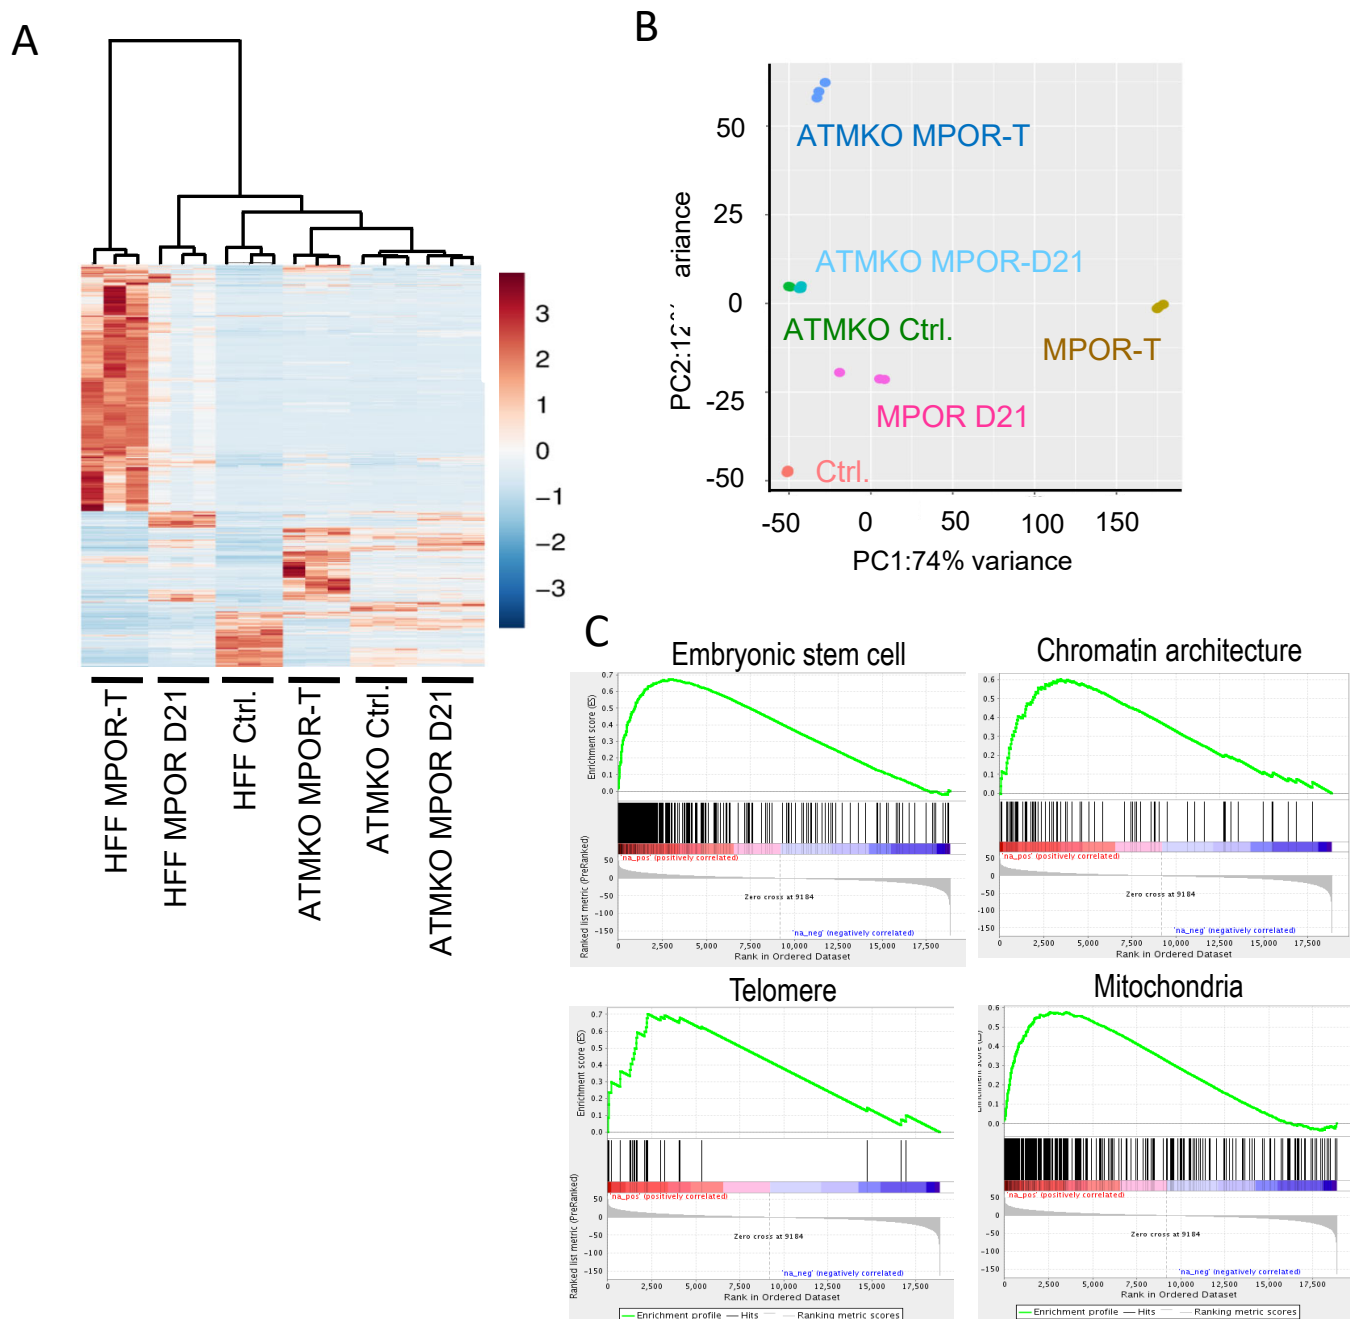

**Fig. S3. Additional gene expression profiling analysis of MPOR induced transformation.**

**A).** Heat map and unsupervised hierarchical cluster analysis of whole transcriptome in MPOR-transduced parental and ATM deficiency HFF cells on Day 21 and transformed cells (MPOR-T). n=3.

**B).** Principal component analysis (PCA) of the transcriptome of MPOR-transduced parental and ATM deficiency HFF cells on Day 21 , and individual colony (MPOR-T). n=3.

**C).** GSEA (gene set enrichment analysis) analysis demonstrating enrichment of genes involved in stem cell signaling, chromatin architecture, telomere extension signaling, and mitochondria genes in MPOR-transduced, morphologically transformed HFF cells.
