# Supplementary material
Source: PubMed Central journal article supplement (PMC7165047)
Supplement: NIHMS1562305-supplement-4.pdf [file NIHMS1562305-supplement-4.pdf]

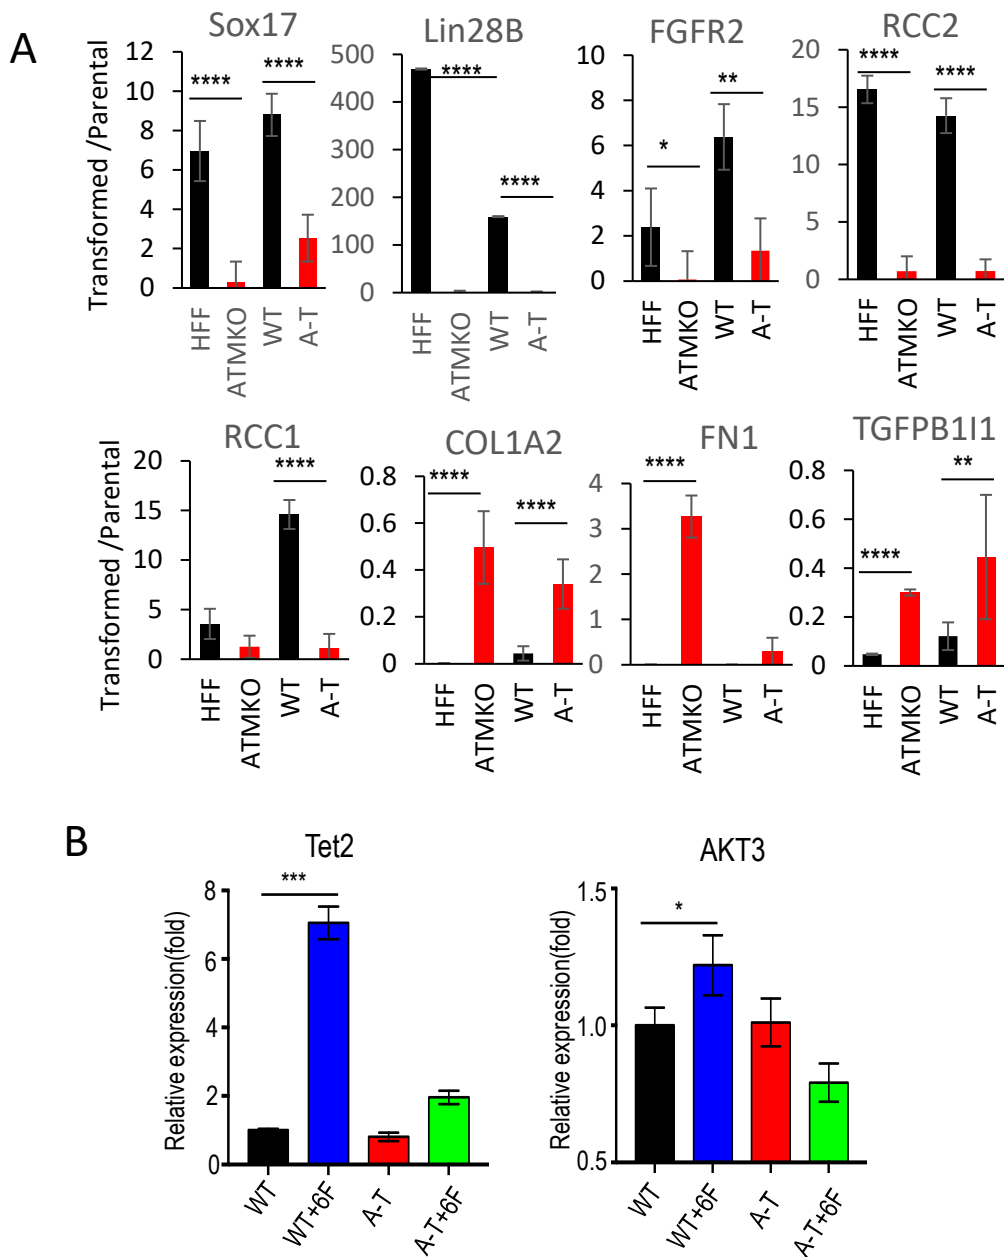

**Fig. S4. Q-RT-PCR confirmation of select gene expression in control and oncogene transformed normal and ATM-deficient cells (day 21 post oncogene transduction).**

**A).** Examined genes include those involved in regulation of stemness (SOX17, Lin28B, and FGFR2), chromatin (RCC1 and RCC2), and fibroblast pathways (COL1A2, FN1, TGFPB111). WT and A-T represent primary fibroblast cells from normal and AT patients.

**B).** Quantitative RT-PCR shows that TET2, AKT3 mRNA expression in 6-factor transduced fibroblasts with wild type ATM (WT,04350) or mutated ATM (A-T, 02052).

Error bars represent Mean  $\pm$  SEM, \* $p < 0.05$ , \*\* $p < 0.01$ , \*\*\* $p < 0.005$ , \*\*\*\* $p < 0.001$ , unpaired t test.
