# Supplementary material
Source: PubMed Central journal article supplement (PMC7165047)
Supplement: NIHMS1562305-supplement-5.pdf [file NIHMS1562305-supplement-5.pdf]

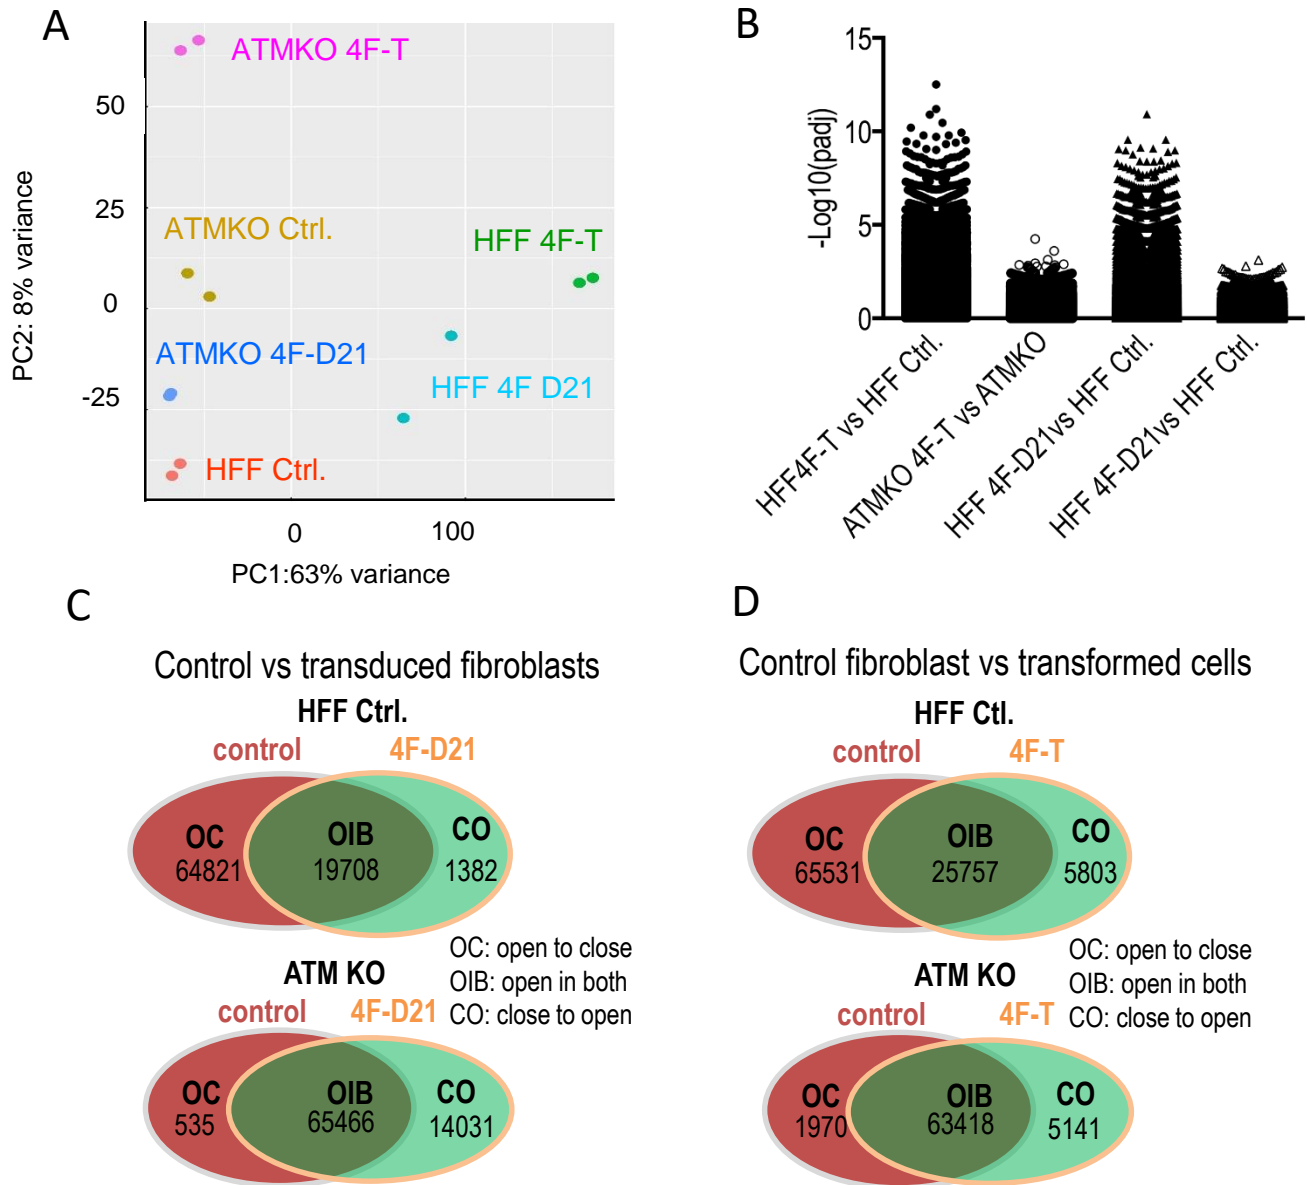

**Fig. S5. ATAC-seq analysis of chromatin accessibility in HFF vector control and ATM knockout (ATM KO) fibroblasts before and after transduction with MPOR(4F) oncogenic cocktail.**

**A).** PCA analysis of ATACs-seq data from HFF Ctrl. and ATM KO fibroblasts before and 4-factor oncogene transduction. 4F-D21 indicates 21 days after 4-factor infection. 4F-T indicates transformed single clone. N=2 for each group.

**B).** Scatter gram of p-values of genes with significant changes in accessibility before and after transduction of 4-factor oncogenic cocktail (MPOR).

**C).** Venn diagrams showing the numbers of gene locations recognized in ATAC-seq which transitioned from closed to open (CO) or form open to closed (OC) status in HFF Ctrl. and ATM KO fibroblasts fibroblasts transduced with MPOR (21 days after gene transduction).

**D).** Venn diagrams showing the numbers of gene locations recognized in ATAC-seq which transitioned from closed to open (CO) or form open to closed (OC) status in HFF Ctrl. and ATM KO fibroblasts vs morphologically transformed cells after MPOR gene transduction.
