# Supplementary material
Source: PubMed Central journal article supplement (PMC7165047)
Supplement: NIHMS1562305-supplement-7.pdf [file NIHMS1562305-supplement-7.pdf]

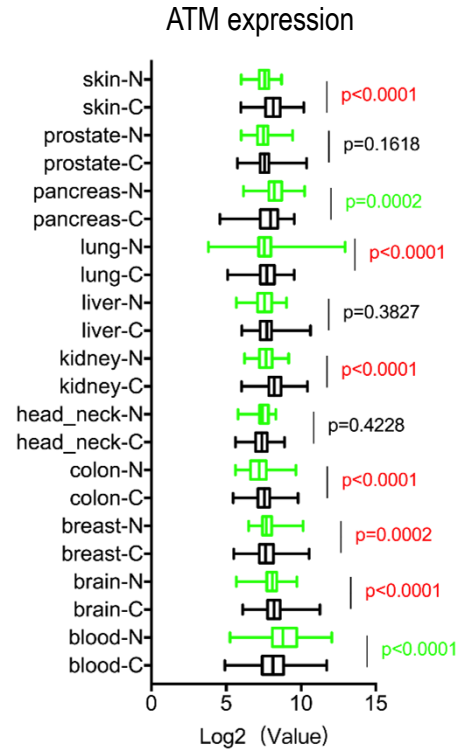

**Fig. S7** Analysis of ATM RNA expression in normal (N-) and matched cancer (C) tissues from human patients with indicated types of cancers in GENT(gene expression across normal and tumor tissue) dataset. A total of 30435 GSM samples from 576 GSE datasets (see **Supplementary info Table S5** for more details) were analyzed.
